# Supplementary material
Source: publisher figshare collection journal article supplement (https://tandf.figshare.com/articles/dataset/_/3083644)

New Rhinocerotidae from the Kisingiri localities (Lower Miocene of Western Kenya)

Denis Geraads, Thomas Lehmann, Daniel J. Peppe, and Kieran McNulty

Journal of Vertebrate Paleontology

Supplementary data

Consensus tree of the two most parsimonious trees (L = 1546; ci = 18; ri = 58) obtained by TNT from matrix Geraads&al\_TNTmatrix.txt

Strict consensus of 2 trees (0 taxa excluded)

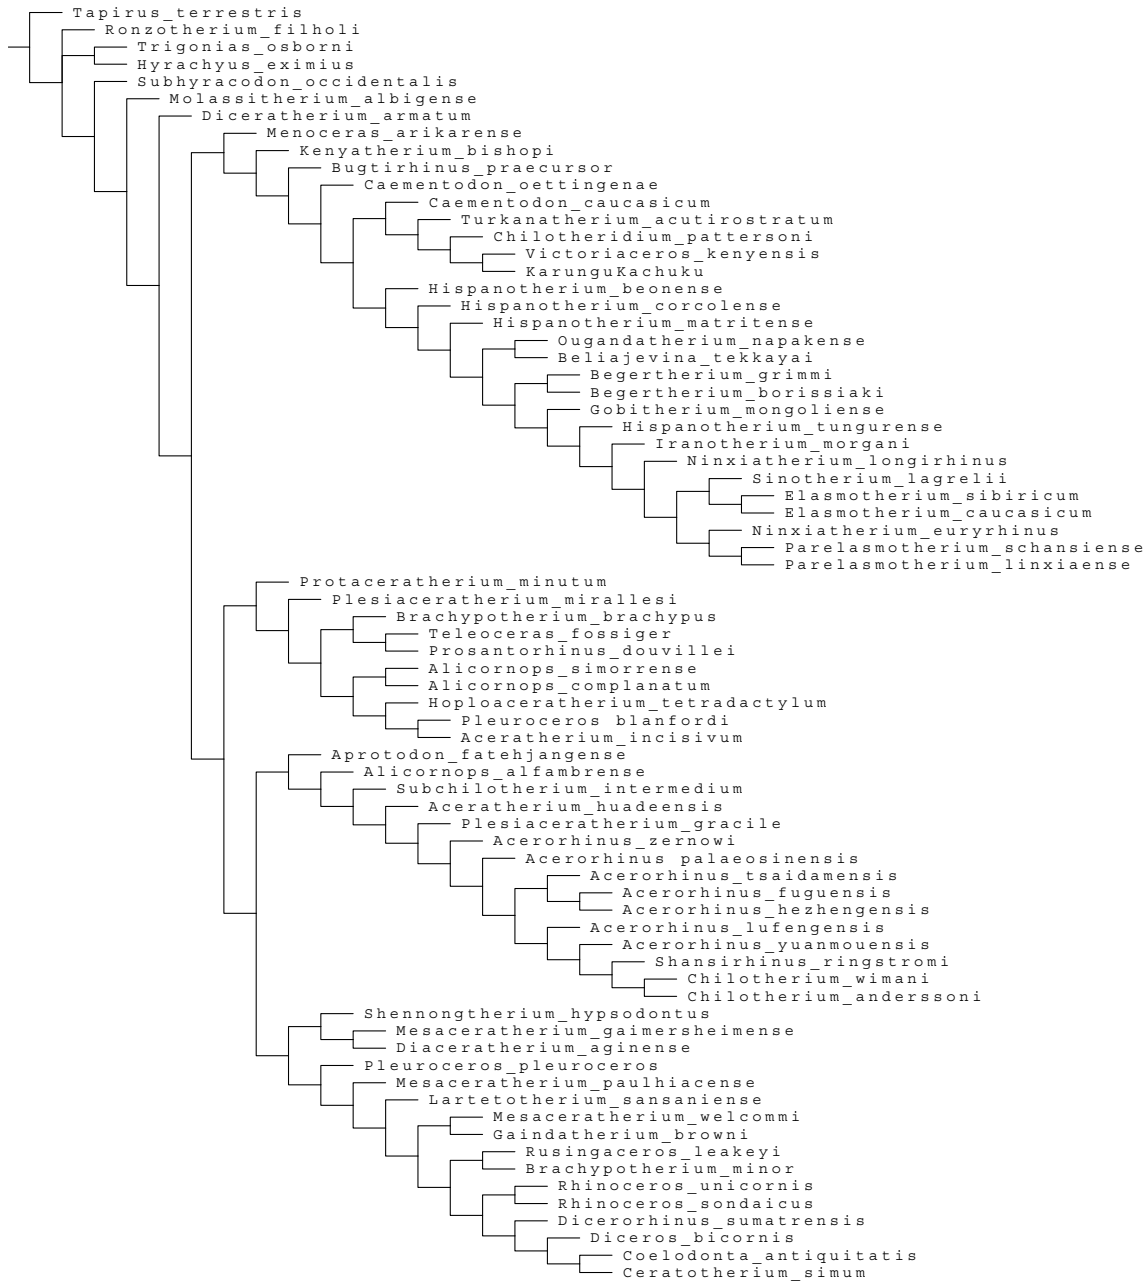

Supplement: Supplementary file 2 [file 2]
